# Supplementary material for: Recognition mechanisms of hemoglobin particles by monocytes – CD163 may just be one
Source: publisher site journal article supplement (doi:10.3762/bjnano.14.85), 2023-10-19
Supplement: Additional file 1 [file 2190-4286-14-85-S1.pdf]

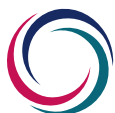

## Supporting Information

for

### **Recognition mechanisms of hemoglobin particles by monocytes – CD163 may just be one**

Jonathan-Gabriel Nimz, Pichayut Rerkshanandana, Chiraphat Kloypan, Ulrich Kalus, Saranya Chaiwaree, Axel Pruß, Radoslina Georgieva, Yu Xiong and Hans Bäuml

*Beilstein J. Nanotechnol.* **2023**, *14*, 1028–1040. [doi:10.3762/bjnano.14.85](https://doi.org/10.3762/bjnano.14.85)

## Supplementary data

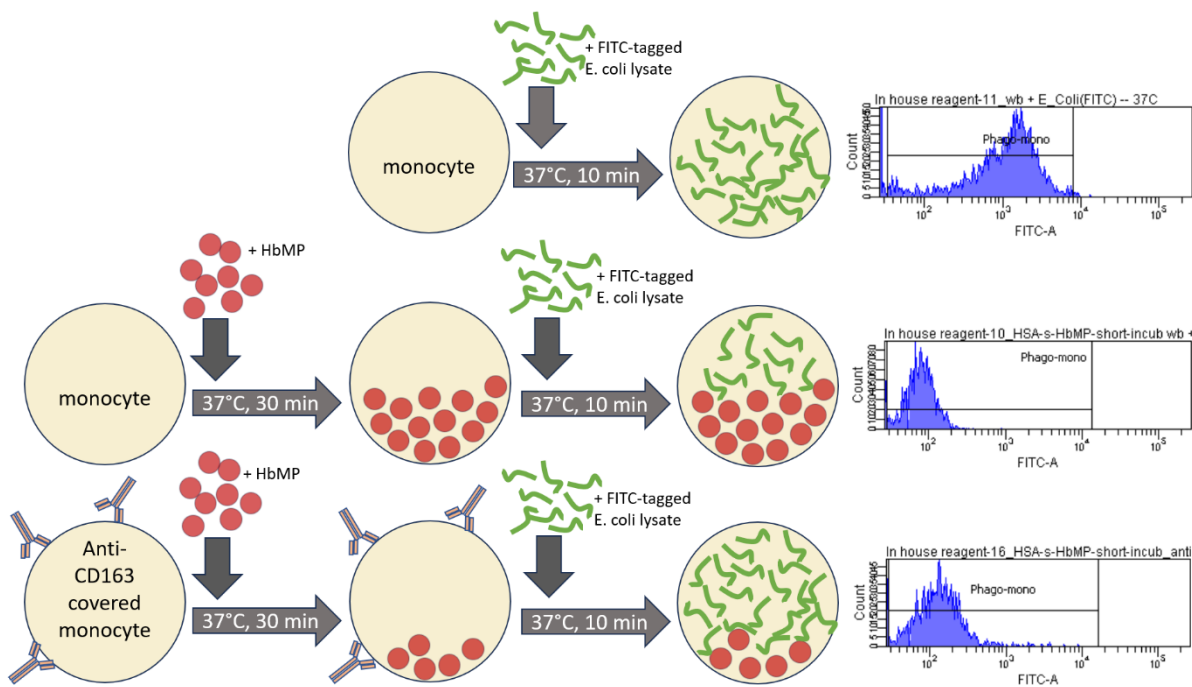

**Figure S1:** Test principle, MFI depending on the uptake of FITC labeled *E. coli* lysate. Uptake of FITC labelled *E. coli* lysate depending on the extent of phagocytosis in pre-feeding step.

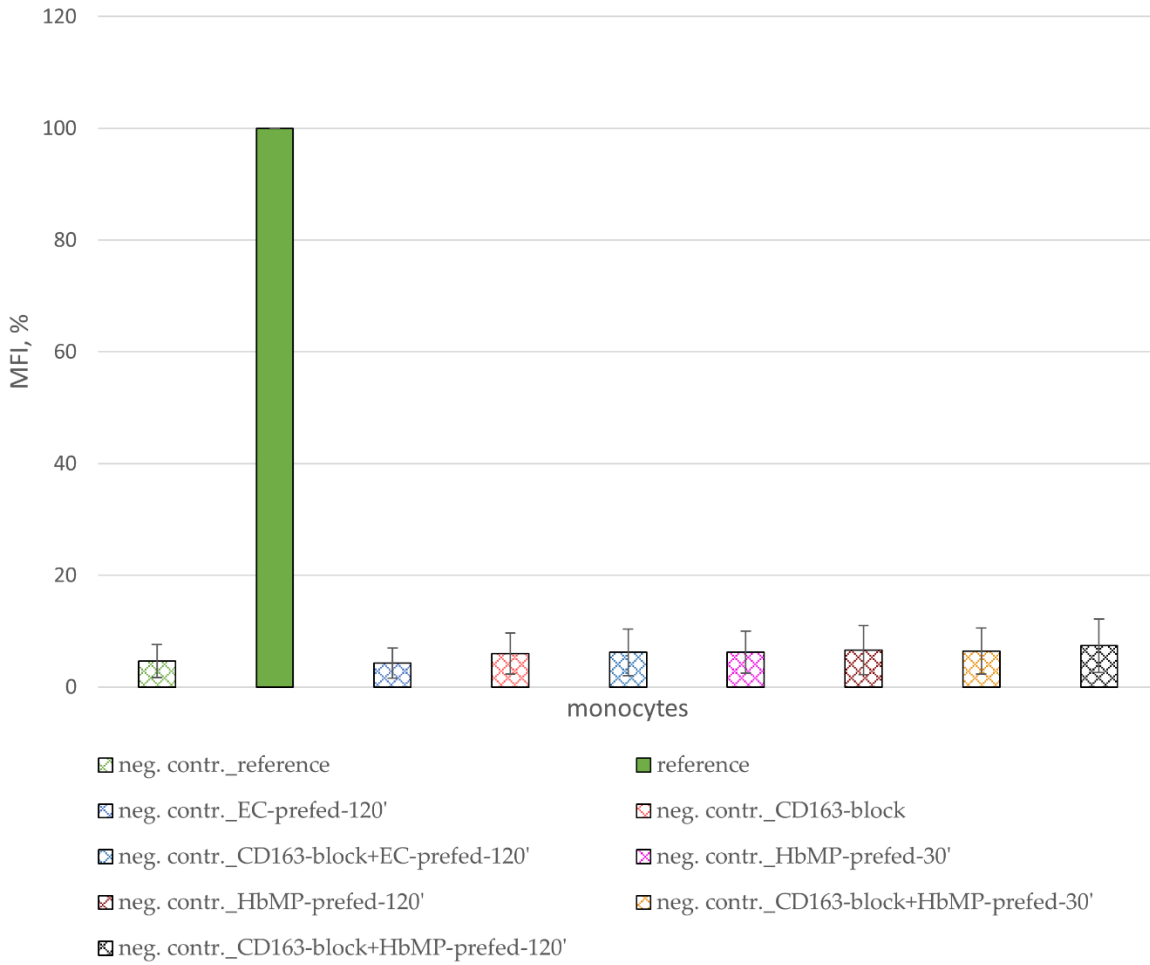

**Figure S2:** negative control-samples, normalized MFI, monocytes;  $N = 3$ .

**Table S1:** Overview of phagocytosis-test No1 samples, normalized MFI-values, monocytes.

| <b>sample</b>                | <b>normalized MFI <math>\pm</math> SEM, %</b> |
|------------------------------|-----------------------------------------------|
| reference                    | 100.0 $\pm$ 0                                 |
| EC-prefed-120'               | 39.8 $\pm$ 11.4                               |
| CD163-block                  | 102.6 $\pm$ 10.5                              |
| CD163-block-EC-prefed-120'   | 30.3 $\pm$ 11.1                               |
| HbMP-prefed-30'              | 51.9 $\pm$ 6.0                                |
| HbMP-prefed-120'             | 47.1 $\pm$ 5.1                                |
| CD163-block-HbMP-prefed-30'  | 68.1 $\pm$ 2.9                                |
| CD163-block-HbMP-prefed-120' | 58.5 $\pm$ 2.1                                |

blocking monocytic CD163, reduces HbMP-uptake by monocytes (MFI is inversely proportional to the extent of uptake in pre-feeding step);  $N = 3$ .
